# Supplementary material
Source: PubMed Central journal article supplement (PMC5963986)
Supplement: NIHMS930991-supplement-1.pdf [file NIHMS930991-supplement-1.pdf]

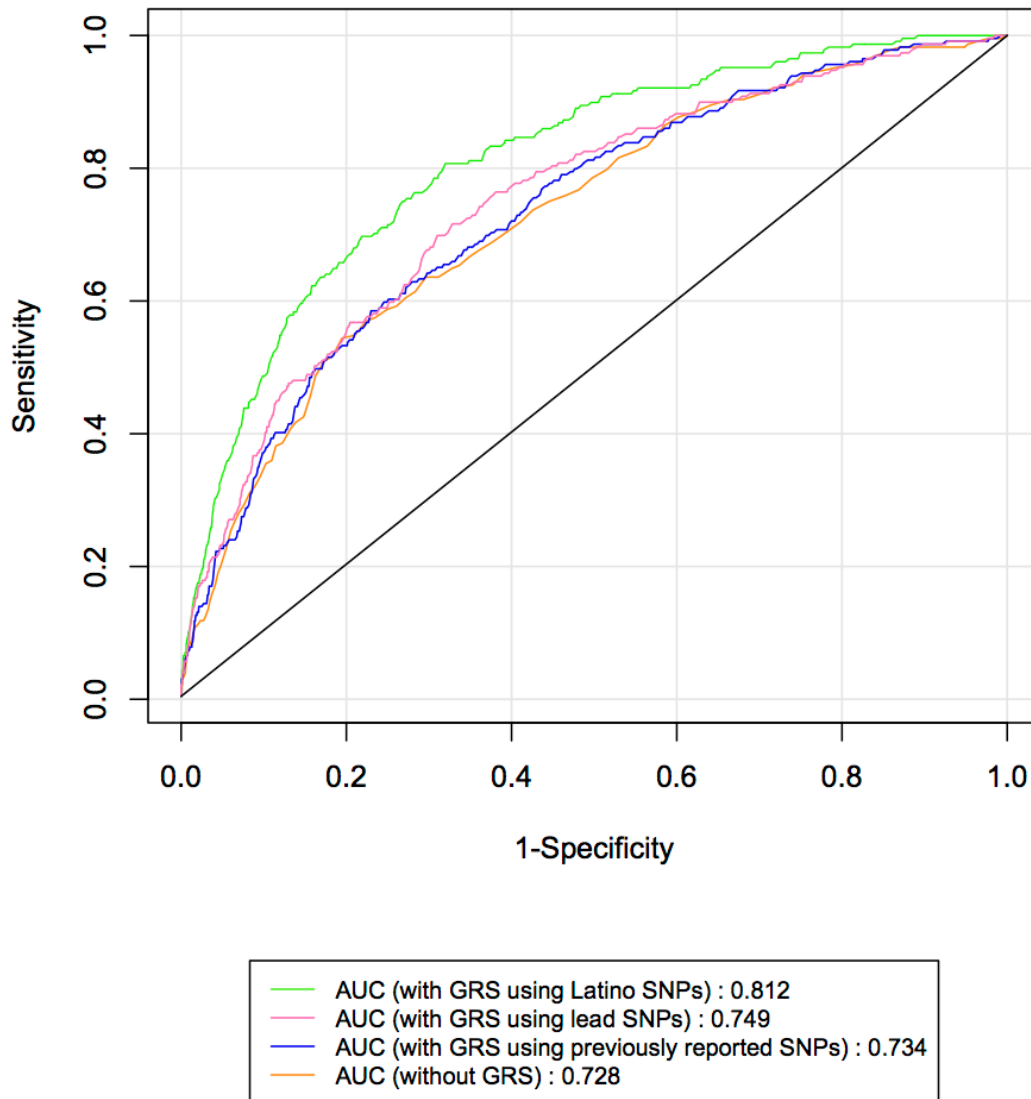

**Supplementary Figure 1.** Receiver operating characteristic curves predicting primary open angle glaucoma for unweighted GRS. The curves are based on logistic regression models adjusting for age and gender without and with the unweighted GRS constructed from previously reported VCDR SNPs, the unweighted GRS generated from lead SNPs, and the unweighted GRS derived from our genome-wide association data. AUC represents the area under the curve, with a larger AUC representing better classification of POAG status. The addition of unweighted GRS derived from our own genome-wide association data significantly improved the discriminatory ability for POAG ( $P < 0.0001$ ).
