# Supplementary material
Source: PubMed Central journal article supplement (PMC5963986)
Supplement: NIHMS930991-supplement-2.pdf [file NIHMS930991-supplement-2.pdf]

Supplementary Table 1. Summary statistics for SNPs included in the Latino specific GRS

| CHR | SNP        | A1 | MAF     | BETA(VCDR) | P(VCDR)   | OR(POAG) | P(POAG)  |
|-----|------------|----|---------|------------|-----------|----------|----------|
| 1   | rs9628616  | T  | 0.07616 | 0.1476     | 0.00034   | 1.215    | 0.2702   |
| 1   | rs1725262  | C  | 0.3323  | -0.07663   | 0.0009352 | 0.8767   | 0.225    |
| 1   | rs34645579 | A  | 0.1288  | 0.1073     | 0.0009297 | 1.158    | 0.3117   |
| 1   | rs3790761  | C  | 0.03441 | -0.1974    | 0.001477  | 1.012    | 0.9696   |
| 1   | rs11811458 | T  | 0.08213 | 0.1263     | 0.00146   | 1.013    | 0.9464   |
| 1   | rs17367865 | A  | 0.4036  | 0.08405    | 0.0001595 | 1.018    | 0.8632   |
| 1   | rs3753420  | C  | 0.1358  | -0.102     | 0.001307  | 1.08     | 0.5926   |
| 1   | rs573733   | C  | 0.3477  | 0.0817     | 0.0003794 | 1.181    | 0.1105   |
| 1   | rs596985   | G  | 0.07576 | -0.1431    | 0.0005362 | 1.119    | 0.5414   |
| 1   | rs705559   | A  | 0.05193 | -0.174     | 0.0003522 | 0.6951   | 0.1457   |
| 1   | rs576888   | A  | 0.2139  | 0.08214    | 0.001934  | 1.171    | 0.1819   |
| 1   | rs6677436  | C  | 0.3163  | -0.08913   | 0.0001823 | 0.8638   | 0.1864   |
| 1   | rs4233323  | G  | 0.1044  | -0.1164    | 0.001091  | 0.8861   | 0.4843   |
| 1   | rs4650270  | T  | 0.4791  | 0.08034    | 0.0001919 | 1.291    | 0.009812 |
| 1   | rs2810893  | T  | 0.3952  | -0.07785   | 0.0004639 | 0.9804   | 0.8457   |
| 1   | rs4847399  | G  | 0.4833  | 0.082      | 0.0001638 | 1.153    | 0.1527   |
| 1   | rs11165058 | T  | 0.1818  | 0.09566    | 0.0007173 | 1.196    | 0.1419   |
| 1   | rs17127702 | G  | 0.04932 | -0.169     | 0.0006472 | 0.8624   | 0.5437   |
| 1   | rs6703152  | A  | 0.4969  | -0.08022   | 0.0002551 | 0.8958   | 0.2709   |
| 1   | rs16836320 | T  | 0.2443  | -0.08346   | 0.001029  | 1.109    | 0.3649   |
| 1   | rs6669449  | G  | 0.1535  | -0.1048    | 0.0003836 | 0.7377   | 0.03873  |
| 1   | rs12048750 | A  | 0.2402  | -0.09854   | 0.0001335 | 0.7001   | 0.005484 |
| 1   | rs16828284 | A  | 0.01207 | -0.3343    | 0.0007309 | 0.6084   | 0.3388   |
| 1   | rs12088073 | C  | 0.4431  | -0.07794   | 0.0003688 | 0.9976   | 0.9804   |
| 1   | rs7521981  | A  | 0.2306  | 0.1024     | 9.53E-05  | 1.421    | 0.002019 |
| 1   | rs6659761  | T  | 0.2514  | 0.07914    | 0.001692  | 1.212    | 0.08659  |
| 1   | rs655598   | G  | 0.2558  | 0.08114    | 0.001051  | 1.248    | 0.04     |
| 1   | rs16836469 | G  | 0.01202 | 0.3206     | 0.001327  | 1.535    | 0.2438   |
| 1   | rs17601260 | G  | 0.1124  | 0.1092     | 0.00138   | 1.133    | 0.4062   |
| 1   | rs11587260 | G  | 0.4826  | 0.07667    | 0.0004909 | 1.061    | 0.5521   |
| 1   | rs2576269  | A  | 0.2456  | 0.09801    | 0.0001045 | 1.214    | 0.08103  |
| 1   | rs6674883  | A  | 0.485   | 0.07509    | 0.0004365 | 0.9802   | 0.8369   |
| 1   | rs11118180 | C  | 0.2536  | -0.09803   | 0.0001248 | 0.7874   | 0.05697  |
| 1   | rs2780624  | A  | 0.2679  | 0.07921    | 0.001287  | 1.086    | 0.4588   |
| 1   | rs270853   | G  | 0.1526  | 0.1099     | 0.0003499 | 1.248    | 0.09673  |
| 1   | rs7515210  | T  | 0.2651  | -0.0945    | 0.0001102 | 0.8434   | 0.1426   |
| 1   | rs28534947 | C  | 0.3663  | -0.071     | 0.001573  | 0.9423   | 0.5673   |
| 1   | rs877884   | C  | 0.2292  | -0.09851   | 0.0001459 | 0.7094   | 0.008404 |
| 2   | rs7588729  | A  | 0.438   | 0.07652    | 0.0004341 | 1.292    | 0.009375 |
| 2   | rs2655455  | A  | 0.4255  | -0.07534   | 0.0006013 | 1.021    | 0.8338   |

|   |            |   |         |          |           |        |          |
|---|------------|---|---------|----------|-----------|--------|----------|
| 2 | rs12710671 | A | 0.4621  | -0.06928 | 0.001511  | 0.9162 | 0.3887   |
| 2 | rs6714955  | A | 0.1738  | -0.1091  | 0.0001714 | 0.8441 | 0.2261   |
| 2 | rs13014787 | G | 0.1975  | -0.08746 | 0.001419  | 0.9345 | 0.5944   |
| 2 | rs7603676  | A | 0.4438  | 0.08095  | 0.0002257 | 1.164  | 0.135    |
| 2 | rs7578888  | G | 0.0924  | -0.1235  | 0.001062  | 0.9761 | 0.8897   |
| 2 | rs10209754 | C | 0.3342  | 0.1028   | 7.22E-06  | 1.215  | 0.0565   |
| 2 | rs2711303  | G | 0.1344  | 0.1087   | 0.0007024 | 1.056  | 0.7089   |
| 2 | rs2356042  | A | 0.01557 | 0.3006   | 0.0006448 | 1.493  | 0.2548   |
| 2 | rs1011572  | C | 0.4697  | 0.07022  | 0.001272  | 1.221  | 0.04692  |
| 2 | rs6753024  | T | 0.1784  | -0.1003  | 0.0003785 | 0.9741 | 0.8397   |
| 2 | rs2861754  | A | 0.2418  | -0.08839 | 0.0005066 | 0.7475 | 0.02052  |
| 2 | rs10166239 | T | 0.07983 | -0.1345  | 0.001102  | 1.121  | 0.5548   |
| 2 | rs9332421  | G | 0.4404  | 0.07914  | 0.0003648 | 1.053  | 0.6112   |
| 2 | rs17014064 | C | 0.01095 | 0.3854   | 0.0002485 | 1.862  | 0.1097   |
| 2 | rs7597545  | C | 0.3848  | -0.07683 | 0.0005761 | 1.004  | 0.9706   |
| 2 | rs8179672  | T | 0.2603  | -0.09772 | 7.55E-05  | 0.8246 | 0.1059   |
| 2 | rs7607618  | C | 0.1146  | -0.1187  | 0.0004478 | 0.72   | 0.05373  |
| 2 | rs17624541 | A | 0.05465 | 0.1616   | 0.0006876 | 1.378  | 0.09889  |
| 2 | rs6731223  | C | 0.05724 | 0.1674   | 0.0004812 | 1.087  | 0.7017   |
| 2 | rs11682055 | G | 0.2167  | 0.09385  | 0.0003996 | 1.09   | 0.4632   |
| 2 | rs11903518 | T | 0.3262  | 0.07748  | 0.001066  | 1.186  | 0.1153   |
| 2 | rs4491733  | G | 0.3175  | -0.07082 | 0.002277  | 0.9895 | 0.9204   |
| 2 | rs734846   | G | 0.07607 | -0.1611  | 0.0001083 | 0.8625 | 0.4891   |
| 2 | rs4144773  | C | 0.3852  | 0.07107  | 0.001976  | 0.9502 | 0.6299   |
| 2 | rs7579360  | T | 0.1788  | -0.09061 | 0.001452  | 0.8369 | 0.1942   |
| 2 | rs10167864 | A | 0.4587  | 0.07913  | 0.0002904 | 1.145  | 0.1753   |
| 2 | rs13390393 | T | 0.06236 | -0.161   | 0.0003685 | 0.7314 | 0.1949   |
| 2 | rs3769215  | T | 0.3787  | 0.07998  | 0.0004035 | 1.12   | 0.2707   |
| 2 | rs4602187  | C | 0.2579  | -0.08089 | 0.001053  | 0.8113 | 0.08405  |
| 2 | rs1370593  | A | 0.3399  | -0.07867 | 0.0007392 | 0.8321 | 0.09497  |
| 2 | rs193603   | C | 0.04098 | 0.1857   | 0.0008141 | 0.6966 | 0.2038   |
| 2 | rs17385923 | A | 0.1604  | -0.1015  | 0.0006018 | 0.7658 | 0.07401  |
| 2 | rs1898716  | T | 0.3533  | -0.07723 | 0.0007919 | 1.024  | 0.8225   |
| 2 | rs16864505 | T | 0.02189 | -0.279   | 0.0001748 | 1.196  | 0.5848   |
| 2 | rs11896521 | G | 0.1044  | -0.139   | 0.0001048 | 0.7527 | 0.1081   |
| 2 | rs12990932 | T | 0.06095 | 0.1715   | 0.0002548 | 1.086  | 0.7006   |
| 3 | rs10222587 | T | 0.101   | 0.1328   | 0.0002228 | 0.9876 | 0.9389   |
| 3 | rs4684761  | A | 0.1488  | 0.1157   | 0.0001231 | 1.208  | 0.1478   |
| 3 | rs293916   | T | 0.06157 | 0.1792   | 8.63E-05  | 1.674  | 0.004646 |
| 3 | rs3773471  | G | 0.2397  | 0.08379  | 0.000975  | 1.241  | 0.04996  |
| 3 | rs10510452 | G | 0.183   | -0.09117 | 0.001148  | 0.8842 | 0.3564   |
| 3 | rs7623233  | A | 0.07501 | -0.1423  | 0.000469  | 0.8735 | 0.4882   |

|   |            |   |         |          |           |        |           |
|---|------------|---|---------|----------|-----------|--------|-----------|
| 3 | rs17053673 | T | 0.08528 | 0.1297   | 0.0008654 | 1      | 0.9998    |
| 3 | rs4974155  | C | 0.4967  | 0.07108  | 0.001524  | 1.081  | 0.4654    |
| 3 | rs17060470 | G | 0.05845 | -0.1662  | 0.0003423 | 0.5316 | 0.01741   |
| 3 | rs6805951  | G | 0.1801  | 0.09426  | 0.0007547 | 1.091  | 0.4842    |
| 3 | rs6549420  | A | 0.3292  | 0.09787  | 2.60E-05  | 1.102  | 0.3582    |
| 3 | rs4078475  | A | 0.4968  | -0.072   | 0.0007317 | 0.8498 | 0.09934   |
| 3 | rs7645365  | T | 0.4901  | 0.0752   | 0.000637  | 1.089  | 0.3976    |
| 3 | rs6777442  | T | 0.07109 | 0.1457   | 0.0006075 | 1.097  | 0.626     |
| 3 | rs10934667 | A | 0.1712  | 0.106    | 0.0003012 | 1.204  | 0.1522    |
| 3 | rs7644047  | A | 0.3821  | 0.07838  | 0.0004518 | 1.243  | 0.03067   |
| 3 | rs9855048  | G | 0.03933 | 0.2003   | 0.0003189 | 0.9201 | 0.7477    |
| 3 | rs4682614  | A | 0.1878  | 0.0935   | 0.0008566 | 1.126  | 0.3464    |
| 3 | rs1466827  | A | 0.4653  | -0.07353 | 0.0008458 | 0.9018 | 0.3076    |
| 3 | rs10513083 | G | 0.4958  | 0.0835   | 0.0002029 | 1.437  | 0.0005814 |
| 3 | rs9864940  | T | 0.4127  | 0.07722  | 0.0004557 | 1.271  | 0.01639   |
| 3 | rs6777677  | A | 0.2479  | -0.08379 | 0.001145  | 0.7599 | 0.02876   |
| 3 | rs13315200 | A | 0.1743  | -0.09513 | 0.0007723 | 0.8705 | 0.306     |
| 3 | rs1798630  | T | 0.162   | 0.118    | 5.36E-05  | 1.23   | 0.1068    |
| 4 | rs16844254 | A | 0.01261 | 0.3688   | 0.0001786 | 1.611  | 0.1978    |
| 4 | rs7688267  | G | 0.4471  | 0.08467  | 0.0001057 | 0.9851 | 0.8809    |
| 4 | rs7694823  | A | 0.101   | 0.138    | 0.0001071 | 1.198  | 0.2425    |
| 4 | rs7696306  | A | 0.1488  | -0.102   | 0.0006911 | 0.8141 | 0.1626    |
| 4 | rs519639   | T | 0.4101  | -0.07142 | 0.001292  | 0.9676 | 0.7477    |
| 4 | rs10003746 | T | 0.2104  | 0.09087  | 0.0006463 | 1.043  | 0.7249    |
| 4 | rs872995   | G | 0.01942 | -0.3048  | 9.40E-05  | 0.6827 | 0.3457    |
| 4 | rs7662010  | A | 0.02193 | 0.2608   | 0.0004452 | 1.342  | 0.3197    |
| 4 | rs6826745  | C | 0.1803  | -0.101   | 0.0004009 | 0.8543 | 0.2485    |
| 4 | rs1512130  | A | 0.2763  | 0.08111  | 0.001012  | 1.38   | 0.002798  |
| 4 | rs10021529 | T | 0.07186 | 0.1658   | 6.90E-05  | 1.594  | 0.004505  |
| 4 | rs17732605 | T | 0.1986  | -0.103   | 0.0001488 | 0.9274 | 0.5558    |
| 4 | rs11946663 | G | 0.01196 | -0.3618  | 0.0002897 | 0.8233 | 0.6864    |
| 4 | rs7695587  | T | 0.07232 | 0.1563   | 0.0001767 | 0.8484 | 0.4224    |
| 4 | rs17502284 | A | 0.1186  | -0.1186  | 0.0004024 | 0.9587 | 0.7898    |
| 4 | rs2169147  | T | 0.4445  | 0.08712  | 6.54E-05  | 1.046  | 0.6586    |
| 4 | rs17486612 | A | 0.04345 | 0.1958   | 0.0002649 | 1.936  | 0.0009767 |
| 4 | rs12643097 | G | 0.3873  | 0.07186  | 0.001212  | 1.35   | 0.002236  |
| 4 | rs17543378 | C | 0.03946 | 0.1754   | 0.001588  | 1.766  | 0.005938  |
| 4 | rs17629999 | C | 0.05003 | 0.1846   | 0.0002747 | 1.514  | 0.04187   |
| 4 | rs12498819 | C | 0.2822  | 0.1001   | 5.27E-05  | 1.097  | 0.4175    |
| 4 | rs4862147  | A | 0.4642  | -0.07615 | 0.0004912 | 0.9814 | 0.8498    |
| 4 | rs1560982  | G | 0.4843  | 0.07286  | 0.0007228 | 1.052  | 0.6062    |
| 4 | rs6552744  | C | 0.2107  | -0.09415 | 0.0003706 | 0.6953 | 0.007214  |

|   |            |   |         |          |           |        |           |
|---|------------|---|---------|----------|-----------|--------|-----------|
| 5 | rs861185   | G | 0.3912  | -0.0745  | 0.0007883 | 0.8905 | 0.2502    |
| 5 | rs16876357 | T | 0.2167  | -0.09969 | 0.000193  | 0.8109 | 0.1048    |
| 5 | rs10942164 | A | 0.02871 | 0.2024   | 0.001845  | 1.543  | 0.08431   |
| 5 | rs16901697 | T | 0.4727  | 0.07869  | 0.0003527 | 1.229  | 0.04189   |
| 5 | rs10941021 | T | 0.343   | 0.08007  | 0.0004614 | 1.014  | 0.8902    |
| 5 | rs840386   | T | 0.4857  | 0.07289  | 0.0007525 | 1.087  | 0.4021    |
| 5 | rs2366981  | T | 0.09184 | 0.1219   | 0.001135  | 0.8369 | 0.3265    |
| 5 | rs164764   | T | 0.3606  | -0.09045 | 8.98E-05  | 0.9011 | 0.3421    |
| 5 | rs27628    | A | 0.4716  | -0.07607 | 0.0006514 | 0.9933 | 0.947     |
| 5 | rs10471360 | T | 0.03849 | -0.1994  | 0.0004509 | 0.8214 | 0.4629    |
| 5 | rs10061061 | T | 0.2812  | 0.08902  | 0.0002694 | 1.001  | 0.9943    |
| 5 | rs7733511  | G | 0.1702  | 0.09646  | 0.001027  | 0.9228 | 0.5676    |
| 5 | rs10071511 | A | 0.2927  | -0.08373 | 0.0005147 | 1.078  | 0.492     |
| 5 | rs17534319 | C | 0.02303 | 0.2865   | 5.85E-05  | 2.305  | 0.0008558 |
| 5 | rs7446237  | C | 0.2619  | 0.08708  | 0.0004487 | 1.218  | 0.07189   |
| 5 | rs17140799 | T | 0.02478 | 0.2441   | 0.0005203 | 1.37   | 0.2816    |
| 5 | rs259188   | C | 0.2339  | -0.08804 | 0.000542  | 0.7249 | 0.01163   |
| 5 | rs17148903 | G | 0.1205  | -0.113   | 0.000785  | 0.7049 | 0.04165   |
| 5 | rs2116565  | T | 0.3502  | -0.08042 | 0.0004145 | 0.9098 | 0.3625    |
| 5 | rs458490   | C | 0.09405 | 0.1479   | 5.56E-05  | 1.005  | 0.9784    |
| 5 | rs30264    | C | 0.1669  | 0.09522  | 0.001135  | 1.079  | 0.5657    |
| 5 | rs2060222  | T | 0.3222  | -0.08429 | 0.0002813 | 0.9818 | 0.8611    |
| 5 | rs10070261 | A | 0.4176  | -0.07354 | 0.0008747 | 1.107  | 0.3124    |
| 5 | rs17110245 | T | 0.2618  | 0.1104   | 9.85E-06  | 1.102  | 0.3938    |
| 5 | rs6579757  | C | 0.4405  | -0.08806 | 5.33E-05  | 1.054  | 0.5969    |
| 5 | rs6864267  | A | 0.02713 | -0.2481  | 0.0002615 | 0.8078 | 0.5048    |
| 5 | rs216140   | C | 0.283   | -0.08227 | 0.0007455 | 0.9168 | 0.4416    |
| 5 | rs248367   | C | 0.1618  | -0.08954 | 0.002481  | 0.8435 | 0.228     |
| 5 | rs7707082  | C | 0.2101  | -0.1078  | 6.43E-05  | 0.7953 | 0.08019   |
| 6 | rs4330570  | T | 0.4658  | -0.08936 | 4.58E-05  | 0.8312 | 0.06824   |
| 6 | rs11751316 | G | 0.04334 | -0.1791  | 0.0006393 | 0.7772 | 0.3593    |
| 6 | rs6939368  | C | 0.1039  | -0.1258  | 0.0007619 | 0.6745 | 0.04818   |
| 6 | rs6906505  | C | 0.4726  | -0.0743  | 0.0005764 | 0.7869 | 0.01587   |
| 6 | rs7767637  | T | 0.2896  | -0.0868  | 0.0003407 | 0.9037 | 0.3801    |
| 6 | rs2292477  | T | 0.06043 | 0.1564   | 0.0007846 | 0.8765 | 0.5523    |
| 6 | rs9350102  | G | 0.1198  | -0.1277  | 0.0001797 | 0.9119 | 0.56      |
| 6 | rs9368062  | G | 0.2141  | -0.09595 | 0.0002957 | 0.9982 | 0.9881    |
| 6 | rs1536581  | T | 0.2996  | -0.09302 | 8.54E-05  | 0.9132 | 0.4067    |
| 6 | rs9393510  | T | 0.1097  | -0.1301  | 0.0001798 | 0.8313 | 0.27      |
| 6 | rs9461357  | T | 0.1047  | -0.135   | 0.0001235 | 0.724  | 0.07858   |
| 6 | rs362523   | A | 0.2559  | 0.09363  | 0.0002322 | 1.109  | 0.3579    |
| 6 | rs2019392  | A | 0.2912  | -0.08033 | 0.0007646 | 0.873  | 0.2216    |

|   |            |   |         |          |           |        |           |
|---|------------|---|---------|----------|-----------|--------|-----------|
| 6 | rs6935473  | A | 0.1923  | 0.09456  | 0.0006034 | 1.163  | 0.2175    |
| 6 | rs12525474 | T | 0.1113  | 0.1089   | 0.001325  | 0.8721 | 0.4029    |
| 6 | rs2397147  | C | 0.1989  | 0.1013   | 0.0002594 | 1.047  | 0.7253    |
| 6 | rs920234   | G | 0.3726  | 0.08823  | 9.30E-05  | 1.403  | 0.0008149 |
| 6 | rs16893491 | A | 0.05414 | -0.1626  | 0.0007597 | 0.8127 | 0.3959    |
| 6 | rs1883897  | C | 0.4798  | -0.07158 | 0.0009624 | 1.02   | 0.8445    |
| 6 | rs9398164  | T | 0.1     | 0.1438   | 8.55E-05  | 1.059  | 0.7313    |
| 6 | rs17057619 | G | 0.02974 | 0.2067   | 0.001331  | 1.028  | 0.9264    |
| 6 | rs17057750 | G | 0.05288 | 0.1657   | 0.0008838 | 1.059  | 0.8065    |
| 6 | rs11155282 | G | 0.3651  | -0.07556 | 0.0009135 | 0.7872 | 0.02854   |
| 6 | rs7745815  | A | 0.02763 | -0.2638  | 5.93E-05  | 0.5442 | 0.1167    |
| 6 | rs3117397  | G | 0.2898  | -0.08737 | 0.000297  | 0.9412 | 0.5915    |
| 6 | rs9372213  | C | 0.4354  | -0.07073 | 0.001181  | 0.9475 | 0.5952    |
| 6 | rs6900525  | T | 0.242   | 0.0936   | 0.0002597 | 1.251  | 0.04691   |
| 6 | rs9400643  | A | 0.4797  | 0.072    | 0.001203  | 0.9695 | 0.7631    |
| 6 | rs6569053  | T | 0.1812  | -0.1093  | 0.0001085 | 0.7931 | 0.08976   |
| 6 | rs1521224  | C | 0.05883 | -0.1634  | 0.0004667 | 0.8611 | 0.5267    |
| 6 | rs17767102 | C | 0.03683 | 0.2003   | 0.0004861 | 1.614  | 0.02807   |
| 6 | rs998630   | G | 0.03337 | -0.2028  | 0.0006306 | 0.8604 | 0.6077    |
| 6 | rs17778438 | A | 0.05327 | -0.1625  | 0.000835  | 0.8275 | 0.4364    |
| 6 | rs10457670 | G | 0.4415  | -0.08155 | 0.0002316 | 0.8243 | 0.06062   |
| 6 | rs1738579  | G | 0.4603  | -0.07782 | 0.0003643 | 0.862  | 0.1399    |
| 6 | rs13199739 | G | 0.02702 | -0.215   | 0.001217  | 0.3568 | 0.04375   |
| 6 | rs598623   | C | 0.4152  | 0.08402  | 0.0001533 | 1.035  | 0.7315    |
| 6 | rs2504931  | A | 0.2241  | 0.08958  | 0.0006827 | 1.114  | 0.3628    |
| 6 | rs1247336  | C | 0.1715  | 0.1092   | 0.0001506 | 1.192  | 0.1623    |
| 6 | rs4709025  | C | 0.117   | 0.1147   | 0.0007711 | 1.135  | 0.4063    |
| 6 | rs9355085  | A | 0.2395  | -0.08288 | 0.0009945 | 0.9831 | 0.8811    |
| 7 | rs7809325  | T | 0.1096  | -0.1159  | 0.0007961 | 0.909  | 0.571     |
| 7 | rs17828856 | A | 0.1465  | 0.1187   | 0.0001061 | 1.146  | 0.31      |
| 7 | rs10486213 | A | 0.05027 | 0.1688   | 0.0007197 | 1.309  | 0.2009    |
| 7 | rs6975676  | A | 0.4626  | 0.08428  | 0.0001068 | 1.056  | 0.5866    |
| 7 | rs6979870  | C | 0.1285  | -0.1179  | 0.0002913 | 0.7117 | 0.04427   |
| 7 | rs7787246  | A | 0.2961  | 0.08073  | 0.0007294 | 1.218  | 0.06842   |
| 7 | rs886159   | G | 0.3043  | -0.08937 | 0.0001566 | 0.9145 | 0.4191    |
| 7 | rs442      | C | 0.2556  | 0.08474  | 0.0006188 | 1.058  | 0.613     |
| 7 | rs2237440  | A | 0.3992  | -0.07958 | 0.000293  | 0.9473 | 0.588     |
| 7 | rs17736822 | C | 0.01028 | 0.3856   | 0.0003979 | 1.261  | 0.6113    |
| 7 | rs10248254 | A | 0.04458 | 0.1742   | 0.00101   | 1.948  | 0.0008082 |
| 7 | rs2374993  | G | 0.1258  | 0.1152   | 0.0004671 | 1.29   | 0.07502   |
| 7 | rs183724   | G | 0.04385 | 0.1997   | 0.0001778 | 1.096  | 0.6949    |
| 7 | rs715205   | A | 0.02085 | 0.3097   | 5.31E-05  | 0.8589 | 0.6901    |

|   |            |   |         |          |           |        |           |
|---|------------|---|---------|----------|-----------|--------|-----------|
| 7 | rs17866960 | T | 0.03809 | -0.1859  | 0.0007842 | 0.642  | 0.155     |
| 7 | rs2030712  | T | 0.2432  | -0.08551 | 0.0007943 | 0.8575 | 0.2048    |
| 7 | rs6971184  | G | 0.3818  | -0.07684 | 0.0006324 | 0.9172 | 0.4082    |
| 7 | rs10259796 | C | 0.1247  | 0.112    | 0.0006482 | 0.9956 | 0.977     |
| 7 | rs1558164  | T | 0.4767  | 0.0808   | 0.0002366 | 1.113  | 0.2908    |
| 8 | rs11136479 | G | 0.33    | -0.08146 | 0.00036   | 1.13   | 0.2386    |
| 8 | rs4270991  | G | 0.4842  | -0.07875 | 0.000326  | 0.7382 | 0.002835  |
| 8 | rs11136679 | T | 0.3133  | -0.08116 | 0.0005111 | 1.004  | 0.9687    |
| 8 | rs6992041  | G | 0.2193  | 0.08851  | 0.0008892 | 1.018  | 0.8862    |
| 8 | rs11778280 | T | 0.09514 | 0.1214   | 0.001006  | 1.176  | 0.3104    |
| 8 | rs17707988 | G | 0.06497 | 0.1534   | 0.0005349 | 0.8886 | 0.5778    |
| 8 | rs28359489 | A | 0.01136 | -0.3534  | 0.0006179 | 0.5236 | 0.2804    |
| 8 | rs13258612 | G | 0.0819  | 0.1429   | 0.0002822 | 1.107  | 0.572     |
| 8 | rs1867887  | C | 0.08271 | -0.14    | 0.0004026 | 0.8371 | 0.3623    |
| 8 | rs13250982 | T | 0.04258 | 0.1891   | 0.0006766 | 1.328  | 0.2434    |
| 8 | rs2925662  | A | 0.05662 | 0.1624   | 0.0004733 | 1.001  | 0.9977    |
| 8 | rs7000025  | G | 0.2295  | -0.08804 | 0.0007811 | 0.8236 | 0.1264    |
| 8 | rs16937772 | A | 0.06088 | 0.162    | 0.0003773 | 1.474  | 0.03537   |
| 8 | rs4737326  | A | 0.1915  | 0.09755  | 0.0004098 | 1.21   | 0.1141    |
| 8 | rs7016327  | G | 0.07819 | -0.1416  | 0.0005047 | 0.6213 | 0.03381   |
| 8 | rs4529421  | G | 0.3941  | 0.07249  | 0.001153  | 1.085  | 0.4144    |
| 8 | rs10808356 | C | 0.2202  | 0.0828   | 0.001377  | 1.255  | 0.04577   |
| 8 | rs1026228  | T | 0.3439  | 0.0822   | 0.0003282 | 1.178  | 0.1099    |
| 8 | rs2134672  | A | 0.07823 | 0.1452   | 0.0003199 | 1.52   | 0.01024   |
| 8 | rs7812511  | G | 0.2916  | 0.08453  | 0.000416  | 1.441  | 0.0004945 |
| 9 | rs10963567 | C | 0.0674  | -0.1505  | 0.0005562 | 1.217  | 0.2896    |
| 9 | rs12342107 | A | 0.2598  | 0.08214  | 0.001048  | 1.159  | 0.1828    |
| 9 | rs7027322  | G | 0.228   | -0.08696 | 0.0009357 | 0.9524 | 0.6949    |
| 9 | rs16934621 | T | 0.07138 | 0.1395   | 0.0008838 | 1.152  | 0.4417    |
| 9 | rs3731239  | G | 0.1785  | -0.1043  | 0.0002486 | 0.7011 | 0.01233   |
| 9 | rs2166128  | T | 0.06112 | 0.1684   | 0.0002956 | 0.8611 | 0.5342    |
| 9 | rs10973681 | G | 0.2061  | 0.09002  | 0.0008517 | 1.024  | 0.8479    |
| 9 | rs943935   | T | 0.09563 | -0.1271  | 0.0006409 | 0.9083 | 0.5799    |
| 9 | rs4014024  | T | 0.4918  | 0.07074  | 0.001068  | 0.9919 | 0.935     |
| 9 | rs9314742  | G | 0.2348  | 0.09676  | 0.0001718 | 1.099  | 0.418     |
| 9 | rs10867126 | G | 0.4422  | 0.08416  | 0.0001435 | 1.278  | 0.01443   |
| 9 | rs566510   | C | 0.4237  | 0.0803   | 0.0002784 | 1.127  | 0.2296    |
| 9 | rs12349823 | C | 0.4175  | -0.07149 | 0.001293  | 0.8699 | 0.1744    |
| 9 | rs12338469 | T | 0.1698  | 0.101    | 0.0006225 | 1.247  | 0.08554   |
| 9 | rs2809398  | T | 0.414   | -0.07118 | 0.001218  | 0.8283 | 0.06308   |
| 9 | rs10985655 | G | 0.4177  | -0.08047 | 0.0002831 | 0.889  | 0.2577    |
| 9 | rs1476859  | C | 0.4949  | -0.07254 | 0.001073  | 0.9229 | 0.4341    |

|    |            |   |         |          |           |        |          |
|----|------------|---|---------|----------|-----------|--------|----------|
| 9  | rs764373   | C | 0.3583  | 0.07973  | 0.0005102 | 1.096  | 0.3815   |
| 9  | rs10818754 | C | 0.0989  | -0.1172  | 0.001638  | 1.063  | 0.7131   |
| 9  | rs16927477 | A | 0.1068  | 0.1295   | 0.0003029 | 1.358  | 0.04101  |
| 9  | rs1411353  | T | 0.2303  | 0.0886   | 0.0007201 | 1.211  | 0.1016   |
| 9  | rs10987215 | T | 0.07388 | -0.1399  | 0.0007531 | 0.6804 | 0.08254  |
| 9  | rs7019291  | C | 0.4352  | -0.07694 | 0.0006687 | 0.9419 | 0.5786   |
| 9  | rs2252968  | C | 0.2371  | -0.09406 | 0.0003825 | 0.9189 | 0.504    |
| 9  | rs10987687 | T | 0.3569  | 0.08991  | 8.43E-05  | 1.089  | 0.4104   |
| 9  | rs17149310 | A | 0.354   | -0.08317 | 0.0002376 | 0.8416 | 0.1033   |
| 9  | rs7046908  | C | 0.2686  | 0.08582  | 0.0004879 | 1.13   | 0.2611   |
| 10 | rs7893671  | A | 0.1728  | -0.08923 | 0.001734  | 0.851  | 0.2429   |
| 10 | rs4750232  | G | 0.1021  | 0.1463   | 3.68E-05  | 1.218  | 0.2015   |
| 10 | rs7089944  | G | 0.116   | 0.1208   | 0.0003939 | 1.449  | 0.01004  |
| 10 | rs11254147 | C | 0.2519  | -0.0899  | 0.0003363 | 0.6798 | 0.002101 |
| 10 | rs7081201  | T | 0.2882  | -0.07874 | 0.001003  | 1.048  | 0.6663   |
| 10 | rs12255136 | C | 0.1886  | 0.09051  | 0.001131  | 1.236  | 0.0778   |
| 10 | rs6481844  | T | 0.4249  | 0.07743  | 0.0002947 | 1.073  | 0.4747   |
| 10 | rs945589   | T | 0.3151  | -0.08895 | 0.0001786 | 0.9278 | 0.498    |
| 10 | rs1570792  | G | 0.466   | 0.07349  | 0.0007253 | 1.197  | 0.06894  |
| 10 | rs11813034 | T | 0.09022 | 0.1302   | 0.0006664 | 1.301  | 0.1084   |
| 10 | rs10994701 | A | 0.2865  | 0.08014  | 0.0009341 | 1.337  | 0.00717  |
| 10 | rs17312431 | G | 0.06108 | 0.1819   | 4.54E-05  | 1.314  | 0.1437   |
| 10 | rs9414897  | T | 0.2779  | -0.1045  | 1.36E-05  | 0.8702 | 0.2215   |
| 10 | rs7067834  | C | 0.407   | -0.06868 | 0.002088  | 0.8631 | 0.1518   |
| 10 | rs7906924  | A | 0.07493 | 0.1471   | 0.0003823 | 1.412  | 0.03947  |
| 10 | rs3858145  | G | 0.4409  | -0.09313 | 2.70E-05  | 1.046  | 0.6573   |
| 10 | rs1007042  | G | 0.4061  | 0.07824  | 0.0004282 | 1.035  | 0.7352   |
| 10 | rs10762266 | T | 0.2961  | -0.09611 | 5.68E-05  | 0.9578 | 0.6895   |
| 10 | rs4745785  | G | 0.1626  | 0.1142   | 0.0001272 | 1.229  | 0.1129   |
| 10 | rs944945   | T | 0.2     | -0.09871 | 0.0002672 | 1.131  | 0.3056   |
| 10 | rs11201870 | A | 0.131   | 0.1143   | 0.0004045 | 1.342  | 0.0336   |
| 10 | rs2114406  | G | 0.2606  | 0.1172   | 2.52E-06  | 1.126  | 0.2915   |
| 10 | rs1326163  | A | 0.4521  | 0.07515  | 0.000684  | 1.385  | 0.001449 |
| 10 | rs12098593 | A | 0.07711 | 0.1634   | 5.43E-05  | 1.44   | 0.02431  |
| 10 | rs2817683  | T | 0.3798  | 0.08704  | 9.47E-05  | 0.9643 | 0.7218   |
| 10 | rs610785   | G | 0.1748  | 0.08976  | 0.001427  | 1.192  | 0.1604   |
| 10 | rs4918769  | A | 0.2777  | -0.08324 | 0.0005991 | 0.9007 | 0.3547   |
| 10 | rs7089236  | G | 0.4167  | 0.07136  | 0.001112  | 0.9488 | 0.6007   |
| 10 | rs11594353 | C | 0.13    | -0.101   | 0.001806  | 1.026  | 0.867    |
| 11 | rs11041270 | A | 0.2029  | 0.09723  | 0.0003139 | 1.093  | 0.4508   |
| 11 | rs1406095  | T | 0.4204  | -0.07052 | 0.001539  | 1.06   | 0.567    |
| 11 | rs11023007 | T | 0.01584 | 0.3052   | 0.0004216 | 1.271  | 0.5045   |

|    |            |   |         |          |           |        |           |
|----|------------|---|---------|----------|-----------|--------|-----------|
| 11 | rs716133   | T | 0.1243  | 0.1078   | 0.0009967 | 1.024  | 0.8749    |
| 11 | rs11027565 | A | 0.07865 | -0.1537  | 0.0001536 | 0.8103 | 0.2704    |
| 11 | rs1994373  | C | 0.2334  | -0.09437 | 0.0002593 | 0.884  | 0.3127    |
| 11 | rs7121042  | G | 0.02364 | -0.2648  | 0.0002208 | 0.7319 | 0.405     |
| 11 | rs1914771  | A | 0.1326  | 0.1099   | 0.000471  | 1.143  | 0.3292    |
| 11 | rs3741367  | T | 0.4789  | -0.06899 | 0.001797  | 1.034  | 0.7366    |
| 11 | rs7947482  | T | 0.03797 | -0.1893  | 0.0008625 | 0.5471 | 0.07004   |
| 11 | rs11827375 | A | 0.05855 | -0.1556  | 0.0008977 | 1.111  | 0.6052    |
| 11 | rs611530   | T | 0.4229  | -0.07421 | 0.0008397 | 0.8574 | 0.1351    |
| 11 | rs10898483 | G | 0.4648  | 0.08458  | 8.20E-05  | 1.096  | 0.3514    |
| 11 | rs10831104 | T | 0.07097 | 0.1453   | 0.0006845 | 0.8172 | 0.3424    |
| 11 | rs7945819  | A | 0.05302 | 0.1697   | 0.0005252 | 1.644  | 0.01041   |
| 11 | rs1009820  | G | 0.3578  | -0.07343 | 0.001268  | 0.9386 | 0.5485    |
| 11 | rs632411   | A | 0.3183  | -0.07659 | 0.001128  | 0.8325 | 0.1047    |
| 11 | rs2615760  | T | 0.1768  | 0.102    | 0.0003435 | 0.9807 | 0.8825    |
| 11 | rs4630256  | C | 0.3143  | 0.08612  | 0.0002838 | 0.9368 | 0.5582    |
| 11 | rs7110338  | G | 0.4063  | -0.08085 | 0.000276  | 1.07   | 0.5094    |
| 11 | rs4586175  | G | 0.2425  | -0.09247 | 0.0002353 | 0.8368 | 0.1375    |
| 11 | rs1940455  | A | 0.2757  | -0.08449 | 0.0005274 | 0.9769 | 0.8365    |
| 11 | rs1784176  | A | 0.08947 | -0.1601  | 1.95E-05  | 0.9065 | 0.5717    |
| 12 | rs1323461  | A | 0.1646  | -0.1069  | 0.0003727 | 1.041  | 0.7749    |
| 12 | rs4763739  | A | 0.3075  | 0.08273  | 0.0004507 | 0.9503 | 0.6382    |
| 12 | rs10505780 | T | 0.1164  | 0.1197   | 0.000506  | 1.386  | 0.02356   |
| 12 | rs12708367 | T | 0.2522  | 0.08834  | 0.0004664 | 1.304  | 0.01826   |
| 12 | rs4764112  | G | 0.4834  | 0.08042  | 0.0001859 | 1.389  | 0.0008749 |
| 12 | rs7136766  | T | 0.08857 | 0.1403   | 0.0002063 | 1.421  | 0.02331   |
| 12 | rs704179   | A | 0.4014  | 0.08032  | 0.0002921 | 1.135  | 0.2119    |
| 12 | rs16928950 | G | 0.09793 | -0.1605  | 1.41E-05  | 1.019  | 0.9142    |
| 12 | rs258434   | G | 0.2443  | 0.09047  | 0.0003894 | 1.159  | 0.204     |
| 12 | rs929270   | C | 0.1413  | 0.1404   | 9.22E-06  | 1.494  | 0.002758  |
| 12 | rs12298037 | T | 0.283   | -0.07556 | 0.001508  | 0.9043 | 0.3657    |
| 12 | rs11170293 | G | 0.03042 | 0.2165   | 0.0006466 | 1.335  | 0.2597    |
| 12 | rs11170624 | T | 0.2228  | 0.09827  | 0.0001879 | 1.278  | 0.03119   |
| 12 | rs586399   | C | 0.1019  | 0.1605   | 9.40E-06  | 1.219  | 0.213     |
| 12 | rs1921038  | T | 0.1557  | -0.1003  | 0.0008142 | 0.9862 | 0.9194    |
| 12 | rs4882462  | T | 0.3928  | -0.08899 | 8.28E-05  | 0.7768 | 0.02335   |
| 12 | rs1284883  | A | 0.2357  | 0.08218  | 0.001271  | 1.244  | 0.0526    |
| 12 | rs325082   | T | 0.2195  | 0.08702  | 0.001012  | 1.065  | 0.5914    |
| 12 | rs12580089 | C | 0.1254  | 0.1165   | 0.0004252 | 1.364  | 0.02692   |
| 12 | rs4759683  | G | 0.3812  | 0.07687  | 0.0005787 | 1.282  | 0.01339   |
| 13 | rs11618660 | T | 0.1637  | 0.09459  | 0.001112  | 1.214  | 0.1306    |
| 13 | rs10507346 | T | 0.09509 | -0.1193  | 0.001262  | 0.7467 | 0.1184    |

|    |            |   |         |          |           |        |          |
|----|------------|---|---------|----------|-----------|--------|----------|
| 13 | rs6491221  | A | 0.08688 | -0.1387  | 0.0003305 | 0.7426 | 0.1288   |
| 13 | rs9598627  | A | 0.0813  | -0.1281  | 0.001109  | 0.7133 | 0.09694  |
| 13 | rs9315980  | C | 0.2331  | 0.08091  | 0.001551  | 1.068  | 0.561    |
| 13 | rs2404599  | T | 0.4445  | -0.07224 | 0.0009958 | 0.9343 | 0.4998   |
| 13 | rs9536415  | C | 0.4737  | 0.0802   | 0.000256  | 1.218  | 0.05098  |
| 13 | rs2800297  | T | 0.3951  | 0.06989  | 0.00145   | 1.091  | 0.3807   |
| 13 | rs359349   | G | 0.1527  | 0.1086   | 0.0002714 | 0.9775 | 0.8667   |
| 13 | rs359338   | A | 0.3863  | 0.08215  | 0.0002103 | 0.9441 | 0.5701   |
| 13 | rs4884761  | G | 0.3256  | 0.07797  | 0.001039  | 1.24   | 0.05172  |
| 13 | rs9599667  | A | 0.2532  | -0.08553 | 0.0006619 | 0.8927 | 0.3294   |
| 13 | rs7982904  | C | 0.03861 | 0.2004   | 0.0003926 | 1.394  | 0.1531   |
| 13 | rs9601155  | G | 0.09074 | -0.1342  | 0.0004368 | 0.986  | 0.9349   |
| 13 | rs9575620  | A | 0.1336  | -0.1104  | 0.0004885 | 1.078  | 0.592    |
| 13 | rs7328495  | A | 0.01768 | -0.3748  | 6.46E-06  | 0.6146 | 0.2623   |
| 14 | rs11161052 | T | 0.3407  | -0.07738 | 0.000722  | 0.83   | 0.0844   |
| 14 | rs8018599  | T | 0.4827  | 0.09197  | 3.87E-05  | 1.199  | 0.07463  |
| 14 | rs8012734  | G | 0.3263  | -0.07859 | 0.0007762 | 0.7856 | 0.03144  |
| 14 | rs698016   | G | 0.02265 | 0.2803   | 0.000122  | 1.007  | 0.9819   |
| 14 | rs10148637 | T | 0.03099 | 0.2393   | 0.0001398 | 1.389  | 0.1824   |
| 14 | rs17782775 | C | 0.3729  | -0.08159 | 0.0002489 | 0.976  | 0.8125   |
| 14 | rs11623410 | C | 0.08849 | 0.1485   | 0.0001012 | 1.025  | 0.8888   |
| 14 | rs7155247  | G | 0.1759  | 0.08832  | 0.002139  | 1.164  | 0.2347   |
| 14 | rs17103788 | G | 0.01048 | 0.3891   | 0.0003    | 1.609  | 0.2488   |
| 14 | rs327432   | G | 0.01244 | 0.3555   | 0.0003026 | 1.909  | 0.0888   |
| 14 | rs1769436  | C | 0.04288 | 0.1927   | 0.0004135 | 0.8973 | 0.6765   |
| 14 | rs799036   | T | 0.2988  | -0.0816  | 0.0005122 | 1.11   | 0.3303   |
| 14 | rs10498568 | A | 0.07387 | 0.1446   | 0.0004215 | 1.13   | 0.4967   |
| 14 | rs11160450 | G | 0.276   | -0.08551 | 0.0004483 | 0.8611 | 0.1957   |
| 14 | rs7144421  | A | 0.1339  | -0.1139  | 0.0003685 | 0.8722 | 0.3748   |
| 14 | rs17097658 | T | 0.1199  | 0.1086   | 0.001179  | 1.421  | 0.01052  |
| 14 | rs8015056  | C | 0.3519  | -0.0878  | 0.0001283 | 0.8442 | 0.1125   |
| 15 | rs12708438 | C | 0.4622  | -0.07689 | 0.0006221 | 0.8618 | 0.1641   |
| 15 | rs7171993  | C | 0.4445  | 0.07675  | 0.0006359 | 1.138  | 0.2045   |
| 15 | rs16960860 | T | 0.09263 | -0.1666  | 1.01E-05  | 0.567  | 0.007122 |
| 15 | rs3803350  | G | 0.03351 | 0.2281   | 0.0001921 | 1.603  | 0.04668  |
| 15 | rs10519246 | T | 0.1103  | -0.1214  | 0.0004576 | 0.7707 | 0.1293   |
| 15 | rs11855842 | T | 0.1655  | 0.09953  | 0.0007384 | 0.9147 | 0.5221   |
| 15 | rs2414638  | C | 0.4631  | -0.08226 | 0.0001814 | 1.087  | 0.4259   |
| 15 | rs11071609 | C | 0.2201  | -0.09025 | 0.0005741 | 0.8326 | 0.1445   |
| 15 | rs8030235  | T | 0.4474  | -0.09354 | 1.62E-05  | 0.7757 | 0.0117   |
| 15 | rs16973530 | T | 0.01245 | 0.3019   | 0.001863  | 1.872  | 0.06844  |
| 15 | rs8041377  | G | 0.02443 | 0.2581   | 0.0002374 | 2.078  | 0.002251 |

|    |            |   |         |          |           |        |           |
|----|------------|---|---------|----------|-----------|--------|-----------|
| 15 | rs11629786 | T | 0.0638  | 0.1609   | 0.0003465 | 1.14   | 0.5075    |
| 15 | rs968136   | T | 0.4473  | -0.07553 | 0.0005678 | 0.9665 | 0.7351    |
| 15 | rs11630088 | C | 0.143   | -0.1263  | 4.30E-05  | 1.047  | 0.7513    |
| 15 | rs12594893 | C | 0.2038  | 0.0921   | 0.0005707 | 1.004  | 0.9739    |
| 15 | rs12440283 | A | 0.4105  | 0.07369  | 0.0008586 | 1.106  | 0.3149    |
| 15 | rs2573652  | T | 0.4294  | -0.07061 | 0.001184  | 0.8328 | 0.07338   |
| 16 | rs12448193 | A | 0.2139  | -0.08933 | 0.0007796 | 0.885  | 0.3289    |
| 16 | rs13334740 | A | 0.07479 | 0.1445   | 0.0004779 | 1.216  | 0.2814    |
| 16 | rs4788009  | G | 0.2324  | 0.09732  | 0.000201  | 1.15   | 0.2367    |
| 16 | rs7404754  | C | 0.3139  | 0.08705  | 0.0002435 | 0.922  | 0.4603    |
| 16 | rs6416796  | C | 0.3467  | 0.08476  | 0.0001788 | 1.098  | 0.3581    |
| 16 | rs1991515  | T | 0.2852  | -0.1051  | 1.93E-05  | 0.9242 | 0.494     |
| 16 | rs6499622  | A | 0.1149  | 0.1056   | 0.001782  | 1.121  | 0.4396    |
| 16 | rs4888957  | G | 0.3052  | -0.07789 | 0.00114   | 0.8042 | 0.05641   |
| 16 | rs9930510  | C | 0.0142  | 0.3043   | 0.0008032 | 1.825  | 0.05843   |
| 16 | rs8058020  | G | 0.314   | 0.07409  | 0.001512  | 1.005  | 0.9653    |
| 16 | rs2292325  | T | 0.1013  | -0.1286  | 0.0003904 | 0.7083 | 0.06146   |
| 16 | rs12918318 | A | 0.4115  | -0.07478 | 0.0007496 | 0.882  | 0.2221    |
| 17 | rs9747501  | A | 0.2424  | -0.08776 | 0.000739  | 0.9134 | 0.4709    |
| 17 | rs9894016  | G | 0.1637  | -0.09903 | 0.0007008 | 0.9269 | 0.5804    |
| 17 | rs17175052 | G | 0.03903 | -0.207   | 0.0001837 | 0.6043 | 0.1228    |
| 17 | rs4083281  | C | 0.1742  | 0.09892  | 0.0006417 | 1.315  | 0.02567   |
| 17 | rs6502872  | T | 0.4807  | 0.0761   | 0.0004648 | 1.396  | 0.0009543 |
| 17 | rs390200   | G | 0.4666  | -0.07338 | 0.0007984 | 1.021  | 0.8373    |
| 17 | rs16946568 | T | 0.2534  | 0.08908  | 0.0003851 | 1.037  | 0.75      |
| 17 | rs7224751  | T | 0.408   | -0.06849 | 0.002009  | 0.8086 | 0.04183   |
| 17 | rs17637018 | A | 0.1794  | -0.09111 | 0.001494  | 0.8499 | 0.2345    |
| 17 | rs11870741 | T | 0.3015  | 0.09789  | 4.42E-05  | 1.244  | 0.04239   |
| 17 | rs7225640  | T | 0.01245 | -0.3423  | 0.0005352 | 1.587  | 0.2621    |
| 17 | rs763512   | A | 0.2633  | -0.07882 | 0.001558  | 0.9638 | 0.749     |
| 17 | rs17640988 | A | 0.3079  | -0.09567 | 4.53E-05  | 0.82   | 0.07141   |
| 17 | rs7217738  | T | 0.03038 | 0.227    | 0.000326  | 1.787  | 0.01797   |
| 17 | rs6504474  | C | 0.4728  | 0.07548  | 0.0005689 | 0.8909 | 0.2501    |
| 17 | rs17783232 | C | 0.3224  | 0.07427  | 0.001302  | 1.093  | 0.4022    |
| 17 | rs902726   | A | 0.4766  | 0.07509  | 0.000534  | 0.9651 | 0.7235    |
| 18 | rs1009238  | G | 0.3028  | 0.0913   | 0.0001115 | 1.013  | 0.9077    |
| 18 | rs8090083  | T | 0.3488  | -0.0754  | 0.0008016 | 0.7474 | 0.006882  |
| 18 | rs562214   | G | 0.2773  | 0.07636  | 0.001908  | 1.255  | 0.03619   |
| 18 | rs12953713 | T | 0.1925  | -0.09419 | 0.0007174 | 0.8779 | 0.3318    |
| 18 | rs4797846  | T | 0.08479 | 0.1362   | 0.0004859 | 1.151  | 0.4205    |
| 18 | rs10502495 | C | 0.2804  | 0.08319  | 0.0007412 | 1.055  | 0.6435    |
| 18 | rs7229734  | G | 0.04134 | -0.1775  | 0.001052  | 0.724  | 0.2577    |

|    |            |   |         |          |           |        |          |
|----|------------|---|---------|----------|-----------|--------|----------|
| 18 | rs8765     | T | 0.3323  | 0.08244  | 0.0003437 | 0.917  | 0.4169   |
| 18 | rs11874754 | A | 0.09512 | 0.1316   | 0.0003578 | 1.039  | 0.8171   |
| 18 | rs751114   | A | 0.1315  | 0.105    | 0.0009147 | 1.203  | 0.175    |
| 18 | rs1657423  | G | 0.137   | 0.1105   | 0.0005192 | 0.883  | 0.4181   |
| 18 | rs7243662  | G | 0.1991  | 0.09413  | 0.0005329 | 1.119  | 0.3596   |
| 18 | rs17072097 | G | 0.3364  | -0.07574 | 0.0009542 | 0.909  | 0.3715   |
| 18 | rs4891724  | G | 0.3403  | -0.07983 | 0.0005607 | 0.8956 | 0.3073   |
| 18 | rs10871567 | G | 0.2721  | 0.07792  | 0.001301  | 1.032  | 0.7693   |
| 19 | rs12488    | T | 0.1585  | -0.09407 | 0.001534  | 0.7857 | 0.09528  |
| 19 | rs7254913  | G | 0.305   | 0.09553  | 4.39E-05  | 1.202  | 0.07778  |
| 19 | rs164016   | C | 0.4107  | 0.07655  | 0.0004435 | 1.287  | 0.01071  |
| 19 | rs10420894 | A | 0.1868  | 0.0898   | 0.001064  | 1.12   | 0.3435   |
| 19 | rs16962145 | A | 0.01892 | -0.2893  | 0.0002971 | 0.8892 | 0.7701   |
| 19 | rs10411210 | T | 0.1472  | 0.09777  | 0.001485  | 1.006  | 0.9637   |
| 19 | rs10153462 | G | 0.3162  | -0.07774 | 0.0008177 | 0.7918 | 0.03622  |
| 19 | rs11666752 | A | 0.4559  | 0.07506  | 0.0007272 | 1.267  | 0.02077  |
| 19 | rs12983273 | T | 0.1496  | -0.1081  | 0.0003413 | 0.7772 | 0.09549  |
| 20 | rs6034870  | G | 0.1143  | -0.1187  | 0.0005428 | 0.9111 | 0.56     |
| 20 | rs6037887  | A | 0.02204 | 0.254    | 0.0006402 | 1.514  | 0.1625   |
| 20 | rs1546478  | C | 0.4282  | 0.07671  | 0.000519  | 1.108  | 0.3062   |
| 20 | rs6140010  | A | 0.486   | 0.07985  | 0.0002654 | 1.13   | 0.223    |
| 20 | rs6131096  | G | 0.03788 | 0.1931   | 0.0005355 | 1.737  | 0.0115   |
| 20 | rs11087257 | T | 0.1274  | -0.1013  | 0.001659  | 0.7075 | 0.03926  |
| 20 | rs6046282  | A | 0.4329  | -0.07816 | 0.0004097 | 0.9503 | 0.6147   |
| 20 | rs6046302  | A | 0.2294  | 0.09503  | 0.0003114 | 1.092  | 0.4629   |
| 20 | rs6141846  | T | 0.0757  | -0.1429  | 0.000598  | 0.7744 | 0.2176   |
| 20 | rs1206816  | T | 0.2883  | -0.08324 | 0.0005712 | 0.8381 | 0.1227   |
| 20 | rs3092171  | C | 0.4235  | -0.0833  | 0.0001986 | 0.9395 | 0.5462   |
| 20 | rs736232   | T | 0.4778  | -0.08132 | 0.000254  | 0.8408 | 0.08997  |
| 20 | rs6023406  | G | 0.4293  | 0.07145  | 0.001148  | 1.059  | 0.5652   |
| 20 | rs2254239  | T | 0.3152  | 0.07914  | 0.000815  | 1.122  | 0.2789   |
| 21 | rs10482956 | G | 0.178   | 0.09893  | 0.0004427 | 1.348  | 0.01144  |
| 21 | rs13051424 | A | 0.3217  | -0.08168 | 0.0003729 | 1.093  | 0.4006   |
| 21 | rs2834795  | C | 0.02838 | 0.1989   | 0.002375  | 1.592  | 0.06122  |
| 21 | rs2835831  | C | 0.2136  | -0.09109 | 0.0005883 | 0.9559 | 0.713    |
| 21 | rs2898334  | T | 0.1838  | 0.1144   | 8.38E-05  | 0.9575 | 0.7495   |
| 21 | rs7276817  | A | 0.09845 | -0.1188  | 0.001056  | 0.7216 | 0.08924  |
| 21 | rs1041458  | G | 0.3058  | -0.08225 | 0.0005449 | 0.8372 | 0.1101   |
| 21 | rs4819138  | A | 0.4567  | -0.0884  | 5.01E-05  | 0.803  | 0.02788  |
| 22 | rs533794   | A | 0.1327  | 0.1027   | 0.001197  | 1.189  | 0.208    |
| 22 | rs11089780 | T | 0.2903  | -0.08737 | 0.0002408 | 0.6201 | 6.78E-05 |
| 22 | rs2267339  | T | 0.4113  | -0.07169 | 0.001181  | 0.8643 | 0.1554   |

|    |           |   |         |          |           |        |         |
|----|-----------|---|---------|----------|-----------|--------|---------|
| 22 | rs4821651 | T | 0.1729  | 0.09673  | 0.0007676 | 1.08   | 0.5472  |
| 22 | rs8140898 | T | 0.201   | 0.1085   | 8.22E-05  | 1.013  | 0.9199  |
| 22 | rs6519840 | G | 0.1375  | 0.1044   | 0.0008949 | 0.9905 | 0.9487  |
| 22 | rs743864  | T | 0.4065  | -0.07896 | 0.00039   | 0.8546 | 0.1332  |
| 22 | rs138594  | G | 0.08312 | 0.1402   | 0.0005571 | 1.081  | 0.6842  |
| 22 | rs6519913 | A | 0.4387  | 0.07906  | 0.0003755 | 1.273  | 0.01655 |

---
